# Supplementary material
Source: Springer Nature journal article supplement (https://www.springermedizin.de/resource/supplementary/12865_2006_116_MOESM4_ESM.pdf/9428586)

**A.**

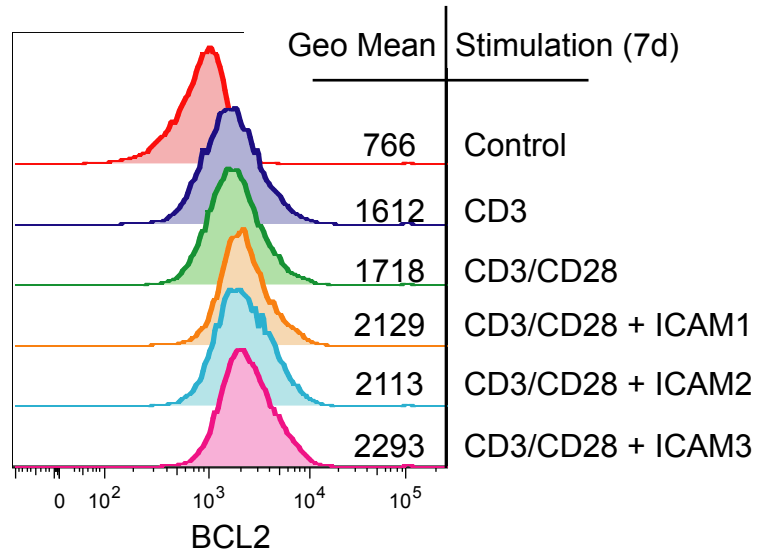

**B.**

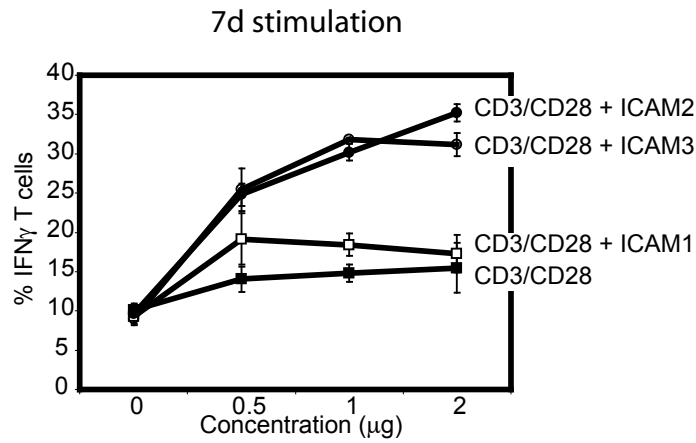

**C.**

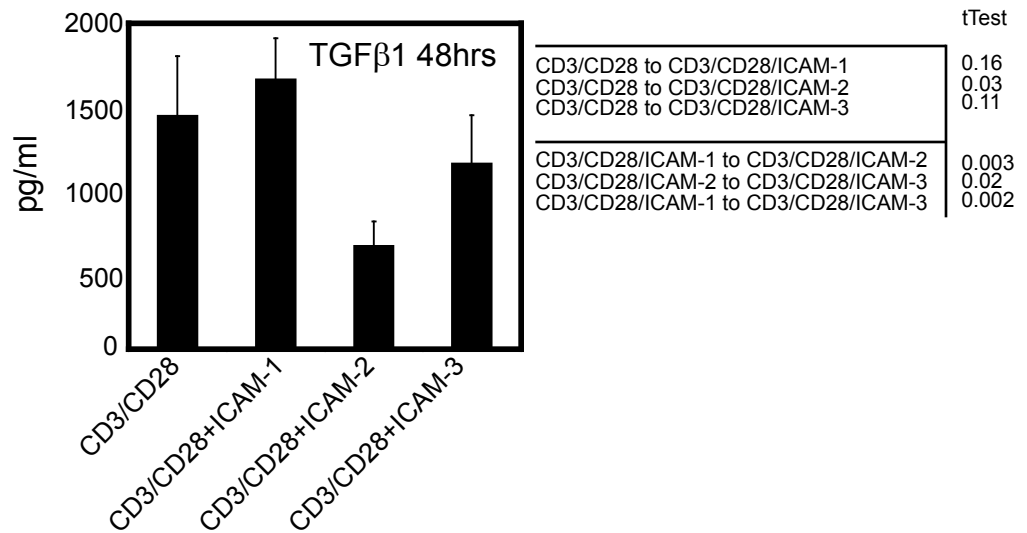

Supplement: MOESM4 [file 9428586]
